# Supplementary material
Source: publisher figshare collection journal article supplement (https://geolsoc.figshare.com/ndownloader/files/16806008)
Supplement: Supplementary file 1 [file 16806008]

Table A1. *Laser Ablation ICP-MS operation parameters.*

| **Laboratory** | **Institut für Mineralogie, Westfälische Wilhelms-Universität Münster** |
| --- | --- |
|  |  |
| **Laser ablation system** | **Photon Machines, Analyte G2, Excimer laser** |
| Ablation cell | HelEx 2-volume cell |
| Wavelength | 193 nm |
| Pulse width | 4 ns |
| Fluence | 3–4 J/cm² |
| Repetition rate | 10 Hz |
| Ablation time | 37 s |
| Spot size | 25µm |
| Sampling mode | Static |
| Carrier gas | He in the cell, Ar sampling and cooling gas |
| Carrier gas flow | 0.9 L/min for mass-flow controller 1; 0.4 L/min for mass-flow controller 2 |
|  |  |
| **ICP-MS instrument** | **ThermoFisher Element 2, single-collector ICP-MS** |
| Radio frequency power | 1250 W |
| Sample and cooling gas flow | 1 L/min; 16 L/min |
| Detection system | SEM |
| Masses measured | 202, 204, 206, 207, 238 |
| Settling time | 1 ms/amu |
| Sample time | 40 ms (202, 204, 207), 10 ms (206), 4 ms (238) |
| Sweep time | 160 ms (202, 204, 207), 40 ms (206), 10 ms (238) |
| Integration time | 0.56 ms |
| Number of runs | 91 |
| Background time | 12 s |
